# Supplementary material for: ETS1-activated SNHG10 exerts oncogenic functions in glioma via targeting miR-532-3p/FBXL19 axis
Source: PubMed Central journal article supplement (PMC7725120; doi:10.1186/s12935-020-01649-2), 2020-12-09

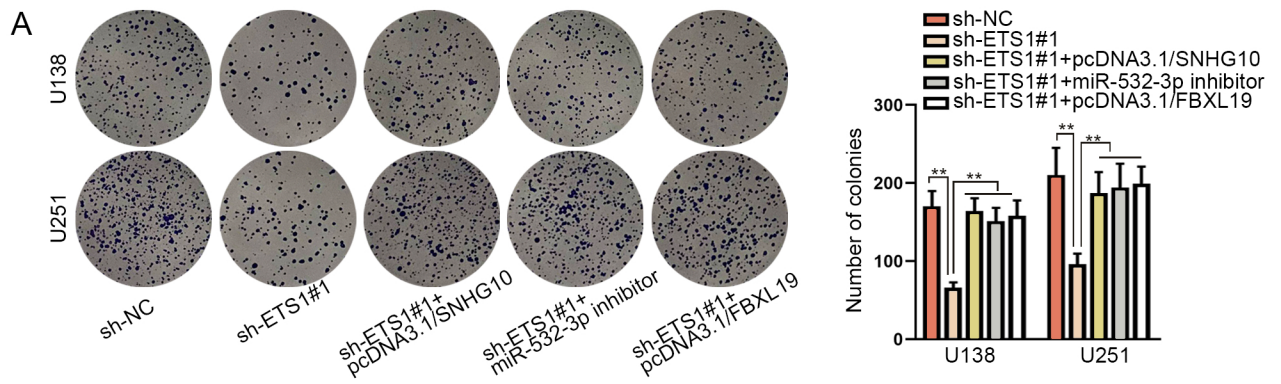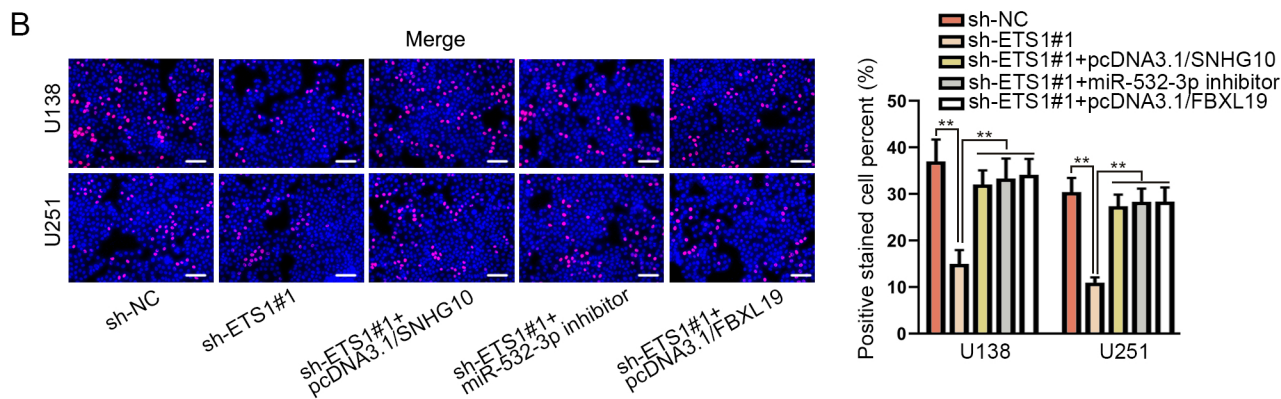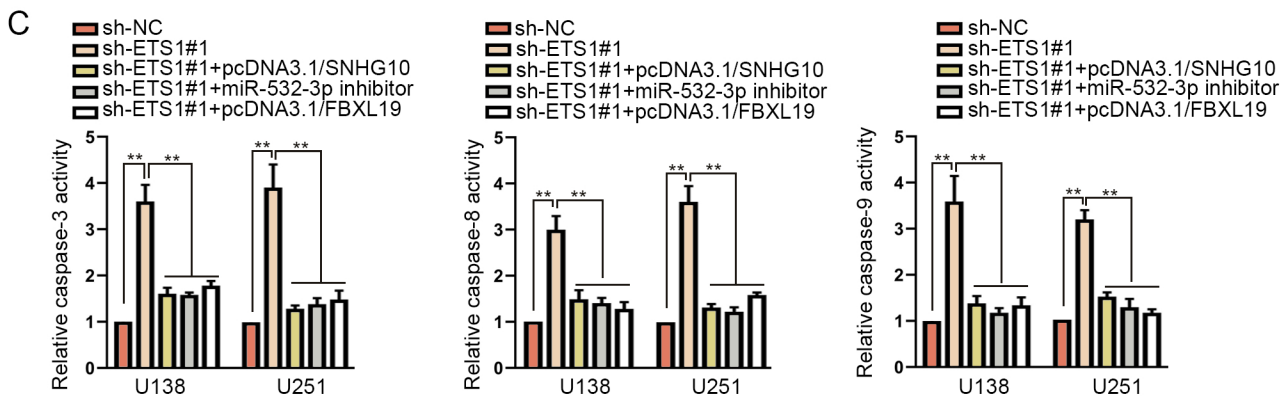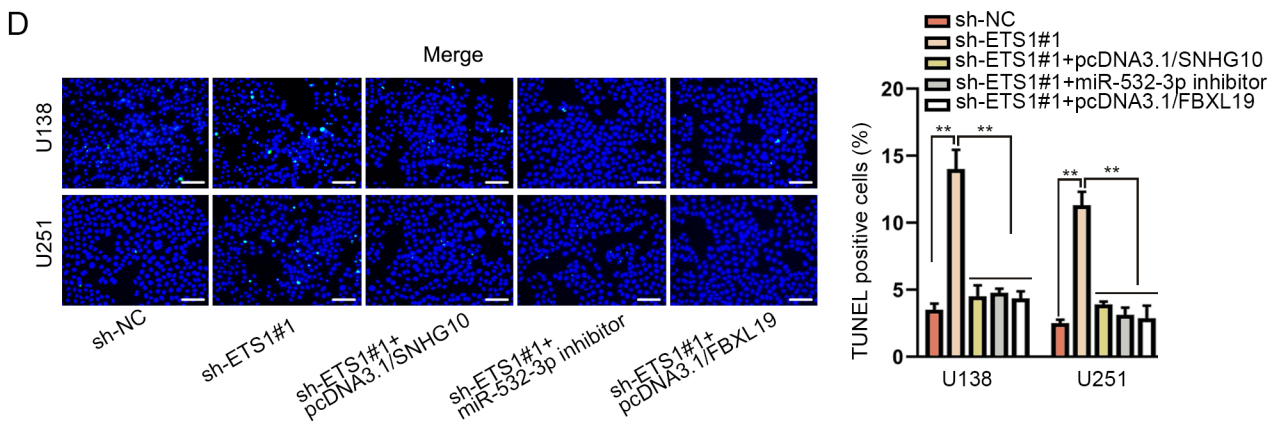

Supplement: 12935_2020_1649_MOESM3_ESM.pdf [file 12935_2020_1649_MOESM3_ESM.pdf]
